# Supplementary material for: Alcohol Acutely Antagonizes Refeeding-Induced Alterations in the Rag GTPase-Ragulator Complex in Skeletal Muscle
Source: PubMed Central journal article supplement (PMC8070399; doi:10.3390/nu13041236), 2021-04-09
Supplement: nutrients-13-01236-s001.pdf [file nutrients-13-01236-s001.pdf]

**Supplement Table S1. Antibodies and gel details for Western blot analysis**

| <b>Antibody</b>         | <b>Vendor</b> | <b>Catalog no.</b> | <b>Dilution</b> | <b>Expected MW (KDa)</b> | <b>SDS-PAGE gel (%)</b> | <b>Protein loaded (µg)</b> |
|-------------------------|---------------|--------------------|-----------------|--------------------------|-------------------------|----------------------------|
| <b>Actin</b>            | CST           | 8457               | 1:10,000        | 45                       | 10                      | 50                         |
| <b>DEPDC5</b>           | Abcam         | Ab185565           | 1:4000          | 170-180                  | 4-20% criterion         | 20                         |
| <b>Folliculin</b>       | CST           | 3697               | 1:1000          | 70                       | 6                       | 90                         |
| <b>GAPDH</b>            | CST           | 2118               | 1:10,000        | 37                       | 12.5                    | 25                         |
| <b>GATOR1 (NPRL2)</b>   | CST           | 37344              | 1:1000          | 41                       | 12.5                    | 50                         |
| <b>GATOR2 (Mios)</b>    | CST           | 13557              | 1:1000          | 98                       | 10                      | 50                         |
| <b>GATSL3</b>           | SC            | 377385             | 1:1000          | 36                       | 15                      | 50                         |
| <b>LAMTOR1</b>          | CST           | 8975               | 1:1000          | 18                       | 15                      | 50                         |
| <b>LAMTOR2</b>          | CST           | 8145               | 1:1000          | 14                       | 15                      | 90                         |
| <b>LAMTOR3</b>          | CST           | 8168               | 1:1000          | 14                       | 15                      | 90                         |
| <b>LAT1</b>             | CST           | 5347               | 1:1000          | 39                       | 15                      | 50                         |
| <b>mTOR total</b>       | CST           | 2972               | 1:1000          | 289                      | 6                       | 90                         |
| <b>mTOR (S2448)</b>     | CST           | 2971               | 1:1000          | 289                      | 6                       | 90                         |
| <b>NDRG1 (T346)</b>     | CST           | 5482               | 1:2000          | 46,48                    | 10                      | 50                         |
| <b>Puromycin</b>        | Millipore     | MABE343            | 1:4000          | 15-250                   | 15                      | 20                         |
| <b>RagA</b>             | CST           | 4357               | 1:1000          | 30                       | 12.5                    | 50                         |
| <b>RagC</b>             | CST           | 9480               | 1:1000          | 50                       | 10                      | 50                         |
| <b>Raptor</b>           | CST           | 2280               | 1:2000          | 150                      | 6                       | 90                         |
| <b>Rheb</b>             | CST           | 13879              | 1:1000          | 16                       | 15                      | 90                         |
| <b>Sestrin -1</b>       | Proteintech   | 21668-1-AP         | 1:1000          | 66-68                    | 15                      | 50                         |
| <b>Sestrin-2</b>        | Proteintech   | 10795-1-AP         | 1:1000          | 54-60                    | 7.5                     | 50                         |
| <b>Sestrin-3</b>        | Abgent        | AP12471c           | 1:1000          | 57                       | 10                      | 50                         |
| <b>SGK1 (S422)</b>      | Abcam         | 55281              | 1:1000          | 49                       | 10                      | 50                         |
| <b>S6K1 (T389)</b>      | CST           | 9234               | 1:1000          | 70,85                    | 7.5                     | 50                         |
| <b>S6K1 total</b>       | SC            | 230                | 1:10,000        | 70,85                    | 12.5                    | 37                         |
| <b>SLC38A9</b>          | ThermoFisher  | PA5-69930          | 1:1000          | 64                       | 10                      | 50                         |
| <b>Tubulin</b>          | CST           | 2128               | 1:10,000        | 55                       | 7.5                     | 90                         |
| <b>v-ATPase – VOA2</b>  | Sigma-Aldrich | SAB2701067         | 1:1000          | 98                       | 7.5                     | 50                         |
| <b>V-ATPase – VB1/2</b> | SC            | 271832             | 1:500           | 56                       | 7.5                     | 50                         |

Abcam (Cambridge, UK); Santa Cruz Biotechnology (Dallas, TX); CST, Cell Signaling Technology (Danvers, MA), DSHB, Developmental Studies Hybridoma Bank (Iowa City, Iowa); Invitrogen/ThermoFisher (Carlsbad, CA); Sigma (St. Louis, MO). MW, molecular weight.
